# Supplementary material
Source: MDPI journal article supplement (https://www.mdpi.com/2312-7481/9/5/120)
Supplement: s1 [file s1]

Supporting Materials for

**Two One-dimensional Copper-Oxalate-Framework with Jahn-Teller Effect:  $[(\text{CH}_3)_3\text{NH}]_2[\text{Cu}(\mu\text{-C}_2\text{O}_4)(\text{C}_2\text{O}_4)]\cdot 2.5\text{H}_2\text{O}$  (I) and  $[(\text{C}_2\text{H}_5)_3\text{NH}]_2[\text{Cu}(\mu\text{-C}_2\text{O}_4)(\text{C}_2\text{O}_4)]\cdot \text{H}_2\text{O}$  (II)**

Bin Zhang,<sup>\*,a</sup> Yan Zhang,<sup>b</sup> Zheming Wang,<sup>\*,c</sup> Yang Sun,<sup>d</sup> Tongling Liang,<sup>d</sup> Mei Liu,<sup>d</sup> and Daoben Zhu<sup>\*,a</sup>

<sup>a</sup> Organic Solid State Laboratory, Beijing National Laboratory of Molecular Sciences Institute of Chemistry, Chinese Academy of Sciences, Beijing, 100190, P. R. China.

<sup>b</sup> Institute of Condensed Matter and Material Physics, Department of Physics, Peking University, Beijing, 100871, P. R. China.

<sup>c</sup> State Key Laboratory of Rare Earth Materials and Chemistry and Applications, Beijing National Laboratory of Molecular Sciences, Peking University, Beijing, 100871, P. R. China. Email: <sup>d</sup> CAS Research/Education Center for Excellence in Molecular Science, CMS \*BNLMS, Institute of Chemistry, Chinese Academy of Science, Beijing, 100190, P. R. China.

*\* To whom correspondence should be addressed. E-mail: zhangbin@iccas.ac.cn, zmw@pku.edu.cn, zhudb@iccas.ac.cn*

## Contents

|                                                                                                                                                                                        |    |
|----------------------------------------------------------------------------------------------------------------------------------------------------------------------------------------|----|
| Table S1. Crystallographic data of <b>I</b> and <b>II</b>                                                                                                                              | S3 |
| Figure S1. IR spectra on crystalline <b>I</b> (top) and <b>II</b> (bottom).                                                                                                            | S4 |
| Figure S2. Experimental X-ray powder diffraction pattern of crystalline sample and simulated one based on single crystal structure of <b>I</b> . <b>I</b> shows preferred orientation. | S5 |
| Figure S3. Experimental X-ray powder diffraction pattern of crystalline sample and simulated one based on single crystal structure of <b>II</b> .                                      | S6 |
| Figure S4. ZFCM/FCM of polycrystal of <b>I</b> under 100 G.                                                                                                                            | S7 |
| Figure S5. ZFCM/FCM of polycrystal of <b>II</b> under 100 G.                                                                                                                           | S8 |

**Table S1.** Crystallographic data of **I** and **II**

| Compound                                 | I                                                                  | II                                                              |
|------------------------------------------|--------------------------------------------------------------------|-----------------------------------------------------------------|
| formula                                  | C <sub>10</sub> H <sub>25</sub> CuN <sub>2</sub> O <sub>10.5</sub> | C <sub>16</sub> H <sub>34</sub> CuN <sub>2</sub> O <sub>9</sub> |
| Fw                                       | 404.86                                                             | 461.99                                                          |
| F(000)                                   | 424                                                                | 980                                                             |
| T, K                                     | 293                                                                | 293                                                             |
| crystal system                           | Triclinic                                                          | Monoclinic                                                      |
| space group                              | $P \bar{1}$                                                        | $P 2_1/c$                                                       |
| a, Å                                     | 9.1043(3)                                                          | 16.9291(3)                                                      |
| b, Å                                     | 9.4286(3)                                                          | 9.6931(1)                                                       |
| c, Å                                     | 11.6225(4)                                                         | 19.2582(3)                                                      |
| $\alpha$ , °                             | 94.154(1)                                                          | 90                                                              |
| $\beta$ , °                              | 112.273(1)                                                         | 136.812(1)                                                      |
| $\gamma$ , °                             | 95.734(1)                                                          | 90                                                              |
| V, Å <sup>3</sup>                        | 912.01(5)                                                          | 2162.812(1)                                                     |
| Z                                        | 2                                                                  | 4                                                               |
| D <sub>c</sub> , g/cm <sup>3</sup>       | 1.474                                                              | 1.419                                                           |
| $\mu$ (Mo K $\alpha$ ), mm <sup>-1</sup> | 1.248                                                              | 1.057                                                           |
| crystal size, mm <sup>3</sup>            | 0.36 × 0.25 × 0.15                                                 | 0.40 × 0.33 × 0.18                                              |
| T <sub>min</sub> and T <sub>max</sub>    | 0.662, 0.835                                                       | 0.744, 0.831                                                    |
| $\theta_{\min.}$ , $\theta_{\max.}$ , °  | 3.496, 27.487                                                      | 3.517, 27.498                                                   |
| no. total reflns.                        | 14735                                                              | 33283                                                           |
| no. uniq. reflns (R <sub>int</sub> )     | 4144(0.0361)                                                       | 4944(0.0440)                                                    |
| no. obs. [ $I \geq 2\sigma(I_0)$ ]       | 2963                                                               | 3359                                                            |
| no. params                               | 229                                                                | 260                                                             |
| R1, wR2 [ $I \geq 2\sigma(I_0)$ ]        | 0.0366, 0.0852                                                     | 0.0394, 0.1036                                                  |
| R1, wR2 (all data)                       | 0.0595, 0.0913                                                     | 0.0652, 0.1139                                                  |
| GOF                                      | 0.980                                                              | 1.032                                                           |
| $^a\Delta\rho$ , e/Å <sup>3</sup>        | 0.457, -0.350                                                      | 0.773, -0.759                                                   |
| $^b$ Max. and mean $\Delta/\sigma$       | 0.001, 0.000                                                       | 0.001, 0.000                                                    |
| CCDC                                     | 881974                                                             | 843074                                                          |

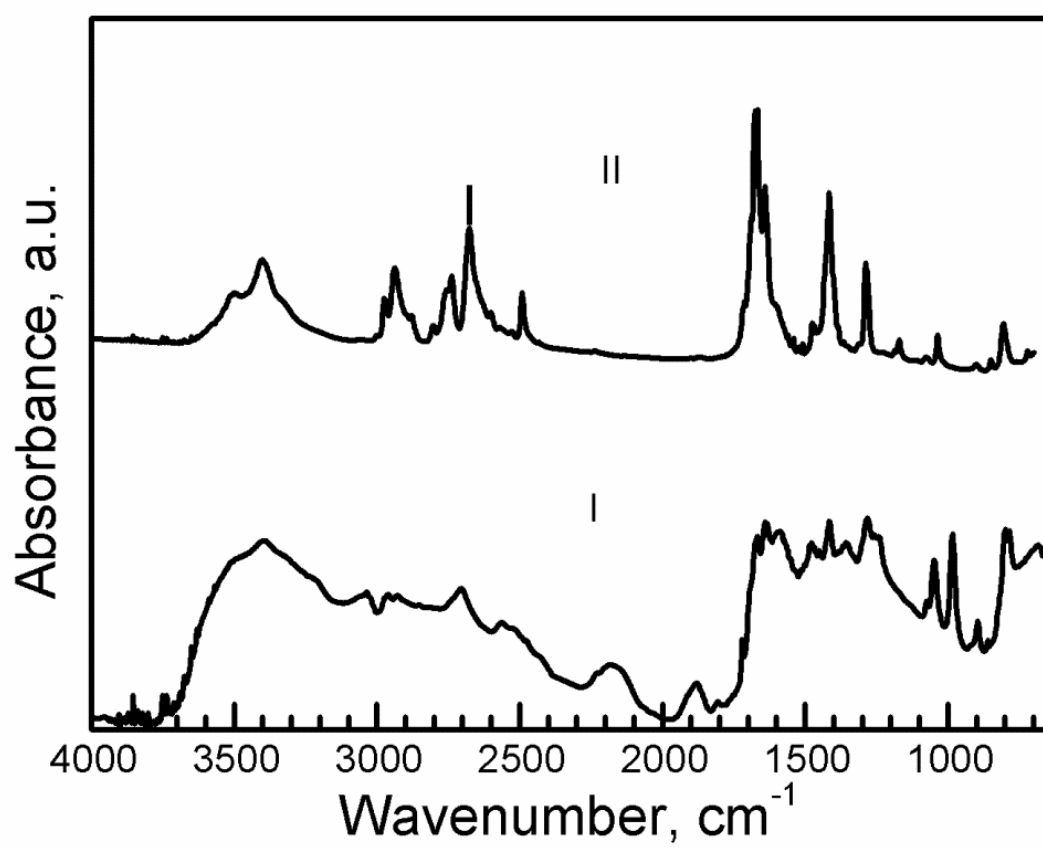

**Figure S1.** IR spectra of **I** and **II**.

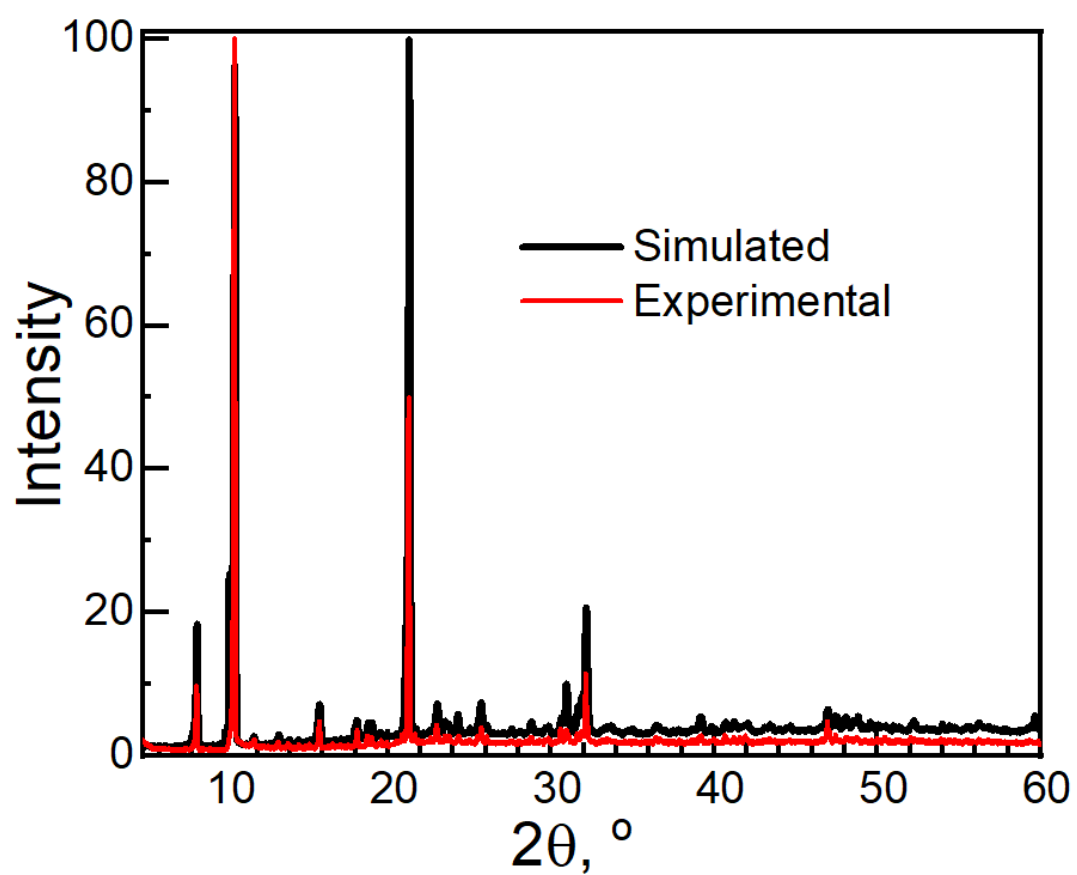

**Figure S2.** Experimental X-ray powder diffraction pattern of crystalline sample and simulated one based on single crystal structure of **I**. **I** shows preferred orientation.

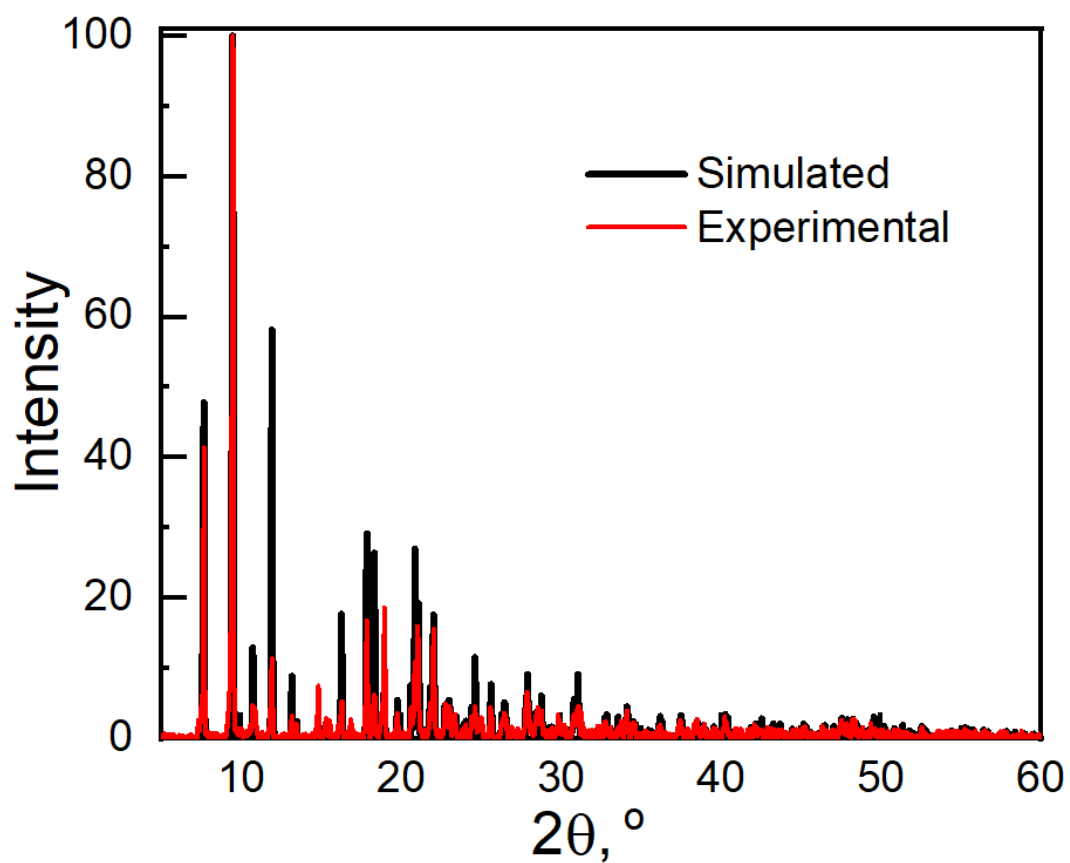

**Figure S3.** Experimental X-ray powder diffraction pattern of crystalline sample and simulated one based on single crystal structure of **II**.

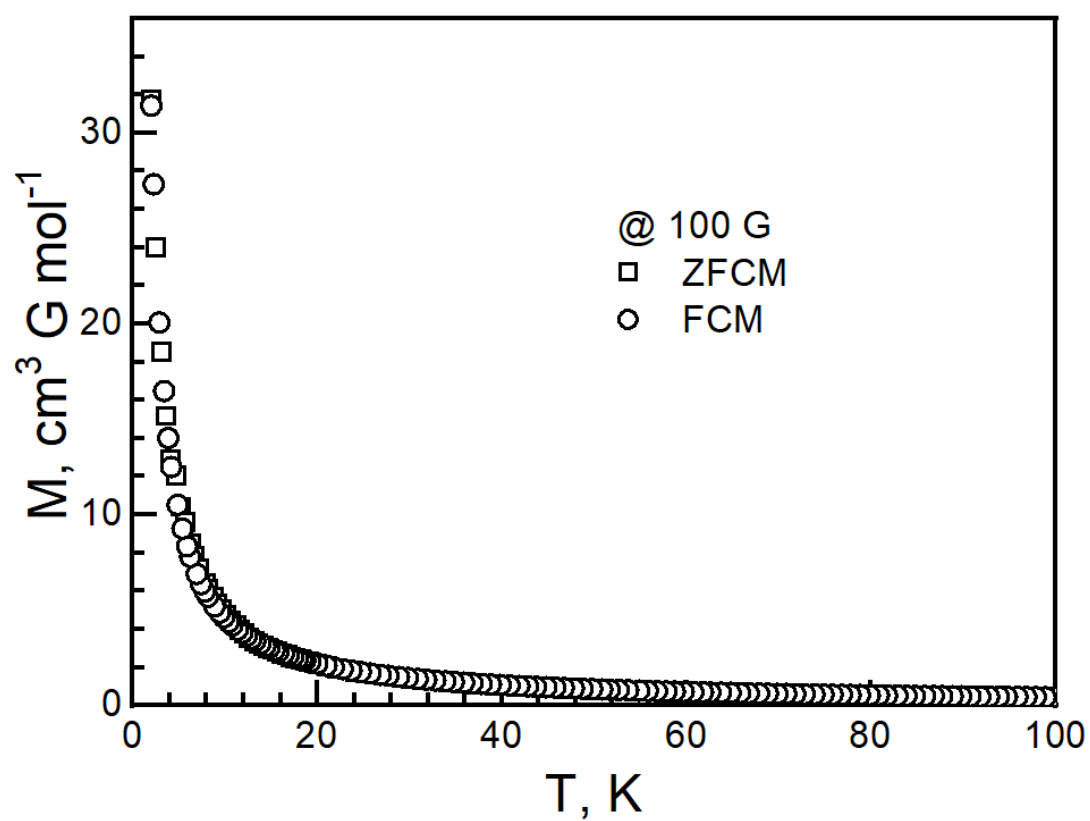

**Figure S4.** ZFCM/FCM of polycrystal of **I** under 100 G.

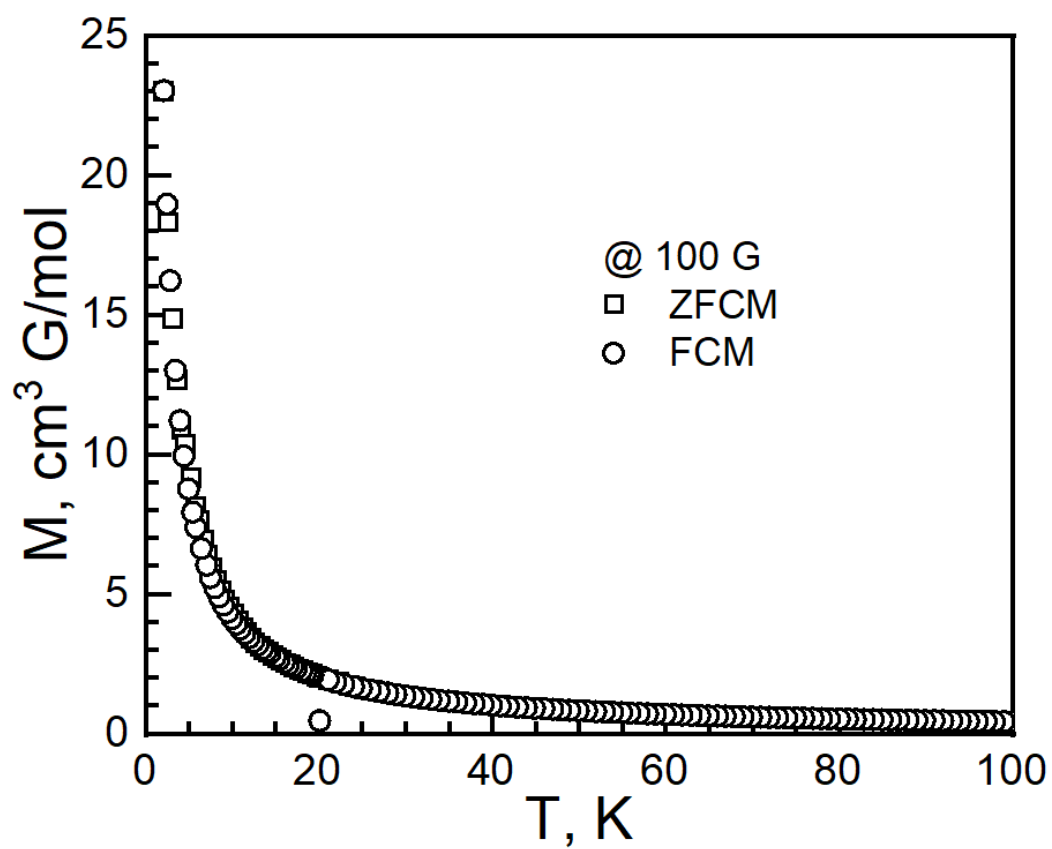

**Figure S5.** ZFCM/FCM of polycrystal of **II** under 100 G.
